# Supplementary material
Source: PubMed Central journal article supplement (PMC4609733)
Supplement: JCM.01985-15_zjm999094577so1.pdf [file JCM.01985-15_zjm999094577so1.pdf]

**SUPPLEMENTARY TABLE 1** Identification of *Yarrowia lipolytica* by VITEK 2 YST ID card, API 20C AUX, and MALDI-TOF MS

| <i>Isolate</i>     | <i>VITEK 2 YST ID card (probability)</i> | <i>API 20C AUX (probability)</i>                                                  | <i>MALDI-TOF MS (top match score)</i> |
|--------------------|------------------------------------------|-----------------------------------------------------------------------------------|---------------------------------------|
| PW3298             | <i>Yarrowia lipolytica</i> (96.0%)       | <i>Candida magnoliae</i> (97.2%) or<br><i>Sporobolomyces salmonicolor</i> (42.9%) | <i>Yarrowia lipolytica</i> (2.093)    |
| PW3299             | <i>Yarrowia lipolytica</i> (98.0%)       | <i>Candida magnoliae</i> (97.4%) or<br><i>Sporobolomyces salmonicolor</i> (91.0%) | <i>Yarrowia lipolytica</i> (2.024)    |
| PW3300             | <i>Yarrowia lipolytica</i> (96.0%)       | Unidentified                                                                      | <i>Yarrowia lipolytica</i> (2.215)    |
| PW3301             | <i>Yarrowia lipolytica</i> (94.0%)       | Unidentified                                                                      | <i>Yarrowia lipolytica</i> (2.052)    |
| PW3302             | <i>Yarrowia lipolytica</i> (97.0%)       | Unidentified                                                                      | <i>Yarrowia lipolytica</i> (2.138)    |
| PW3303             | <i>Yarrowia lipolytica</i> (97.0%)       | Unidentified                                                                      | <i>Yarrowia lipolytica</i> (1.958)    |
| PW3304             | <i>Yarrowia lipolytica</i> (99.0%)       | Unidentified                                                                      | <i>Yarrowia lipolytica</i> (2.069)    |
| PW3305             | <i>Yarrowia lipolytica</i> (97.0%)       | Unidentified                                                                      | <i>Yarrowia lipolytica</i> (1.884)    |
| PW3306             | <i>Yarrowia lipolytica</i> (98.0%)       | Unidentified                                                                      | <i>Yarrowia lipolytica</i> (2.200)    |
| PW3307             | <i>Yarrowia lipolytica</i> (98.0%)       | <i>Candida zeylanoides</i> (99.5%)                                                | <i>Yarrowia lipolytica</i> (2.250)    |
| PW3308             | <i>Yarrowia lipolytica</i> (97.0%)       | <i>Candida dubliniensis</i> (99.4%)                                               | <i>Yarrowia lipolytica</i> (2.180)    |
| PW3309             | <i>Yarrowia lipolytica</i> (98.0%)       | Unidentified                                                                      | <i>Yarrowia lipolytica</i> (2.112)    |
| PW3310             | <i>Yarrowia lipolytica</i> (98.0%)       | Unidentified                                                                      | <i>Yarrowia lipolytica</i> (1.993)    |
| PW3311             | <i>Yarrowia lipolytica</i> (98.0%)       | <i>Candida zeylanoides</i> (84.5%)                                                | <i>Yarrowia lipolytica</i> (1.918)    |
| PW3312             | <i>Yarrowia lipolytica</i> (98.0%)       | <i>Candida zeylanoides</i> (81.2%)                                                | <i>Yarrowia lipolytica</i> (1.943)    |
| Total <sup>a</sup> | 15/15                                    | 0/15                                                                              | 15/15                                 |

<sup>a</sup> Total number of isolates identified as *Y. lipolytica*.
